# Supplementary material for: Complex interaction of caffeic acid with bovine serum albumin: calorimetric, spectroscopic and molecular docking evidence
Source: Royal Society of Chemistry journal article supplement (doi:10.1039/c7nj03410e), 2017-01-01
Supplement: c7nj03410e1.pdf [file c7nj03410e1.pdf]

## *Interaction of Caffeic Acid with Bovine Serum Albumin is Complex: Calorimetric, Spectroscopic and Molecular Docking Evidence*

*Aurica Precupas, Romica Sandu, Anca Ruxandra Leontieș, Dan-Florin Anghel, Vlad Tudor  
Popa\**

“Ilie Murgulescu” Institute of Physical Chemistry of the Romanian Academy, Splaiul  
Independentei 202, Bucharest, 060021, Romania.

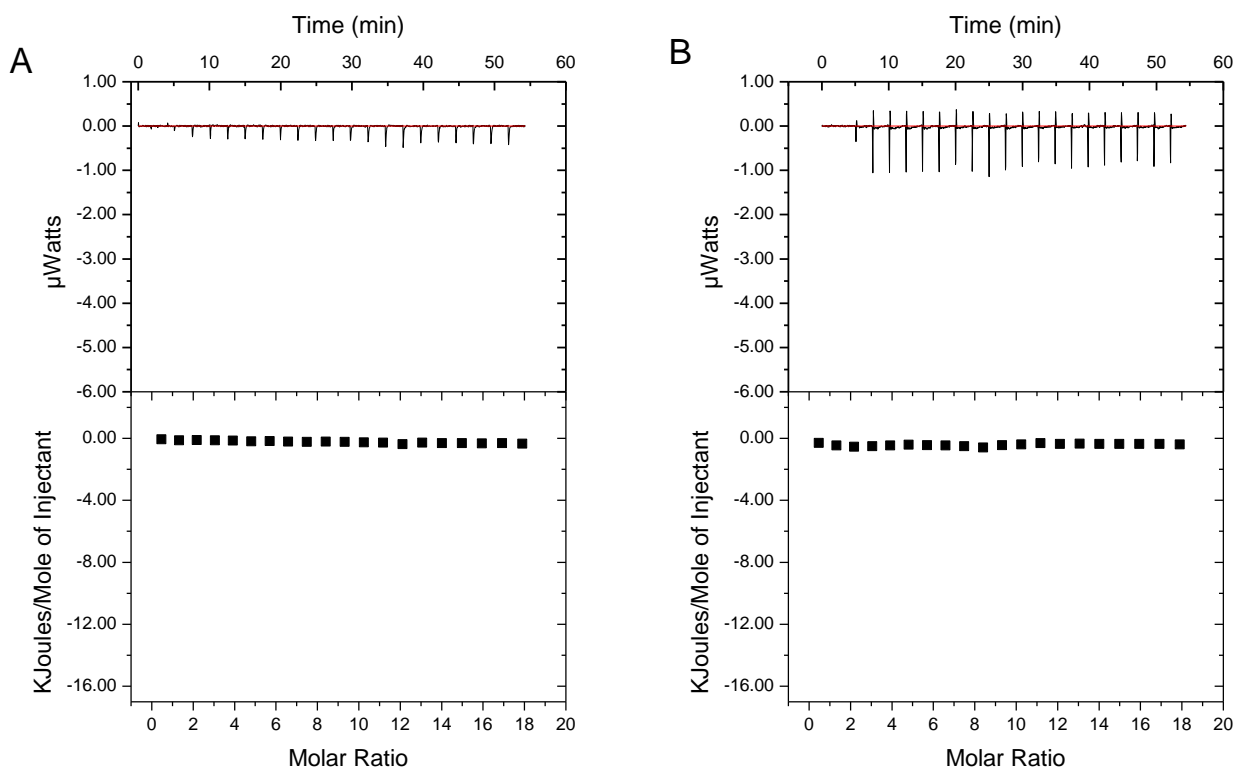

**Fig. S1** ITC binding isotherm displaying the raw data for dilution effect for (A) BSA and (B) CA at 298 K in 0.1 M phosphate buffer (pH 7.4).

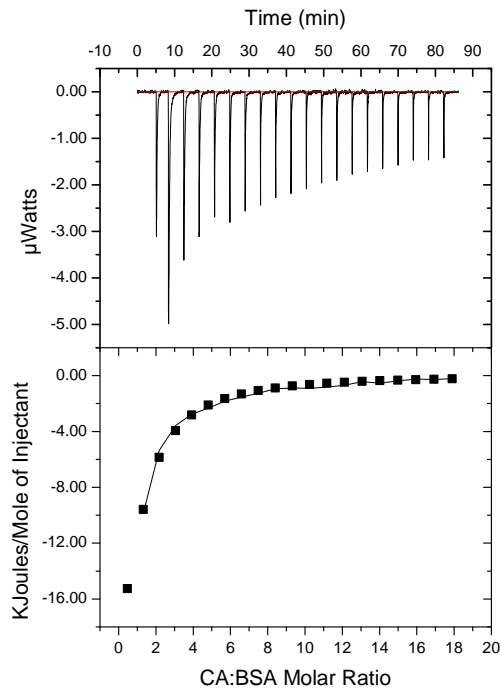

Model: OneSites

Reduced  $\chi^2 = 3121$

$N = 9.61 \times 10^{-6} \pm 0.611$  Sites

$K = 8.73 \times 10^3 \pm 1.62 \times 10^3 \text{ M}^{-1}$

$\Delta H = -4.376 \times 10^9 \pm 2.779 \times 10^{14} \text{ J mol}^{-1}$

$\Delta S = -1.47 \times 10^7 \text{ J mol}^{-1} \text{ K}^{-1}$

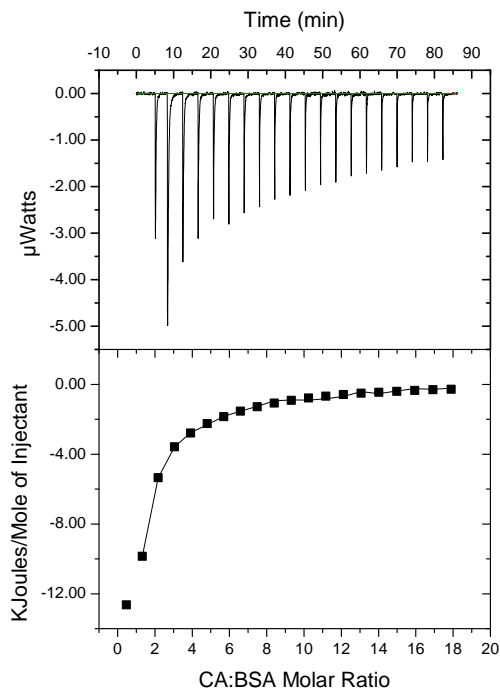

Model: TwoSites

Reduced  $\chi^2 = 471.5$

$N_1 = 1.16 \pm 0.528$  Sites

$K_1 = 2.99 \times 10^5 \pm 6.10 \times 10^5 \text{ M}^{-1}$

$\Delta H_1 = -1.40 \times 10^4 \pm 1.01 \times 10^4 \text{ J mol}^{-1}$

$\Delta S_1 = 58.0 \text{ J mol}^{-1} \text{ K}^{-1}$

$N_2 = 2.84 \pm 2.95$  Sites

$K_2 = 5.55 \times 10^3 \pm 1.93 \times 10^3 \text{ M}^{-1}$

$\Delta H_2 = -9323 \pm 1.11 \times 10^4 \text{ J mol}^{-1}$

$\Delta S_2 = 40.4 \text{ J mol}^{-1} \text{ K}^{-1}$

**Fig. S2** ITC profile for BSA titration with CA. The solid line represents the non-linear least-squares fit to the experimental data points using OneSites Model/TwoSites Model.

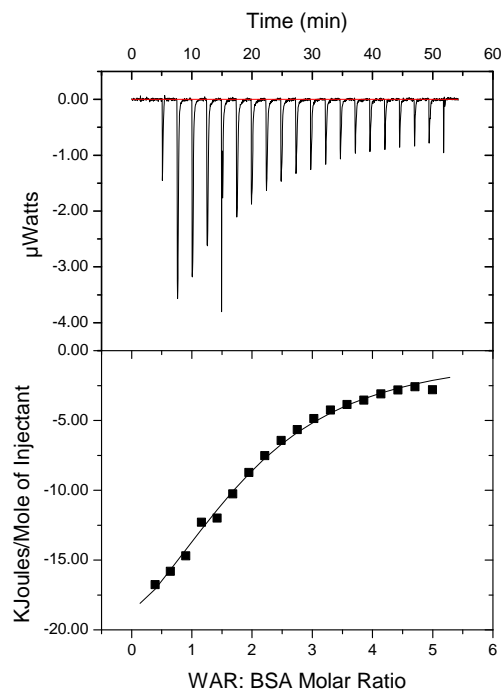

Model: OneSites

Reduced  $\chi^2 = 6797$

$N = 1.81 \pm 0.096$  Sites

$K = 2.15 \times 10^4 \pm 2.59 \times 10^3 \text{ M}^{-1}$

$\Delta H = -2.79 \times 10^4 \pm 2.08 \times 10^3 \text{ J mol}^{-1}$

$\Delta S = -10.70 \text{ J mol}^{-1} \text{ K}^{-1}$

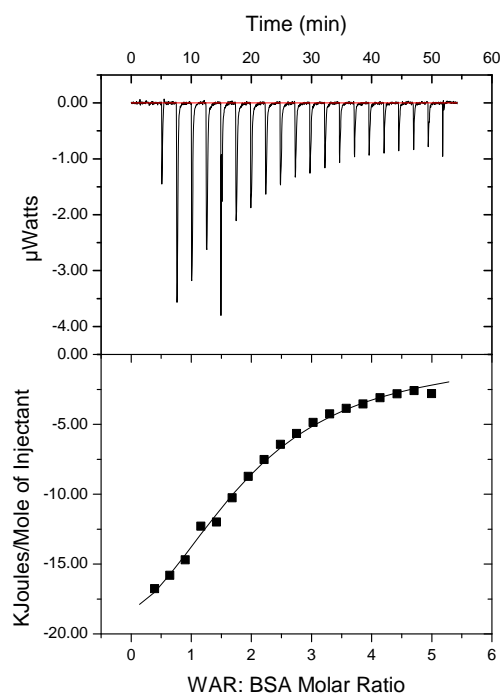

Model: Two Sites sequential binding

Reduced  $\chi^2 = 6239$

$K_1 = 6.66 \times 10^4 \pm 5.4 \times 10^3 \text{ M}^{-1}$

$\Delta H_1 = -2.362 \times 10^4 \pm 0.69 \times 10^3 \text{ J mol}^{-1}$

$\Delta S_1 = 13.1 \text{ J mol}^{-1} \text{ K}^{-1}$

$K_2 = 1.03 \times 10^4 \pm 0.98 \times 10^3 \text{ M}^{-1}$

$\Delta H_2 = -2.785 \times 10^4 \pm 1.53 \times 10^3 \text{ J mol}^{-1}$

$\Delta S_2 = -16.6 \text{ J mol}^{-1} \text{ K}^{-1}$

**Fig. S3** A representative ITC profile displaying the raw data for the integrated heat change (after appropriate correction for heat of dilution) for WAR ( $1.5 \times 10^{-3} \text{ M}$ ) with BSA ( $5 \times 10^{-5} \text{ M}$ ) interaction at 298 K in 0.1 M phosphate buffer pH 7.4. The solid line represents the non-linear least-squares fit to the experimental data points using OneSites Model/Two Sites sequential binding Model.

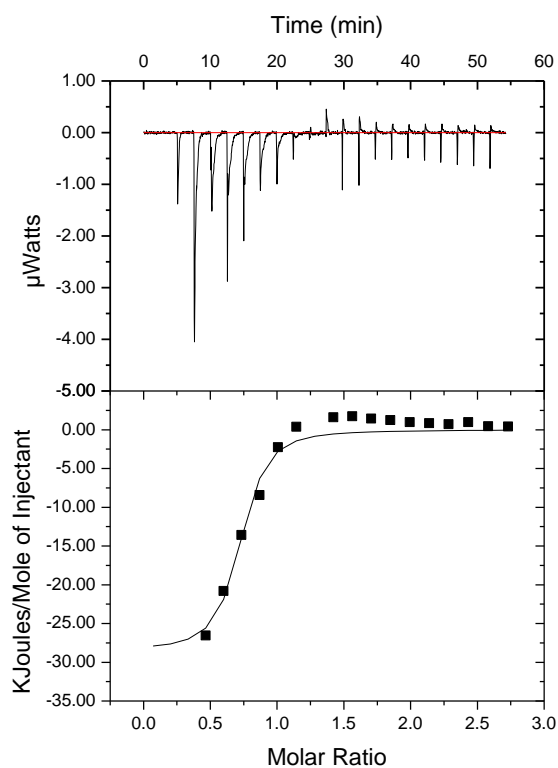

Model: OneSites

Reduced  $\chi^2 = 1.289E5$

$N = 0.68 \pm 0.028$  Sites

$K = 1.44 \times 10^6 \pm 0.69 \times 10^6 \text{ M}^{-1}$

$\Delta H = -2.85 \times 10^4 \pm 2.56 \times 10^3 \text{ J mol}^{-1}$

$\Delta S = 22.30 \text{ J mol}^{-1} \text{ K}^{-1}$

**Fig. S4** A representative ITC profile displaying the raw data for the integrated heat change (after appropriate correction for heat of dilution) for BSA ( $5 \times 10^{-5} \text{ M}$ ) with IBP ( $7.75 \times 10^{-4} \text{ M}$ ) interaction at 298 K in 0.1 M phosphate buffer pH 7.4.

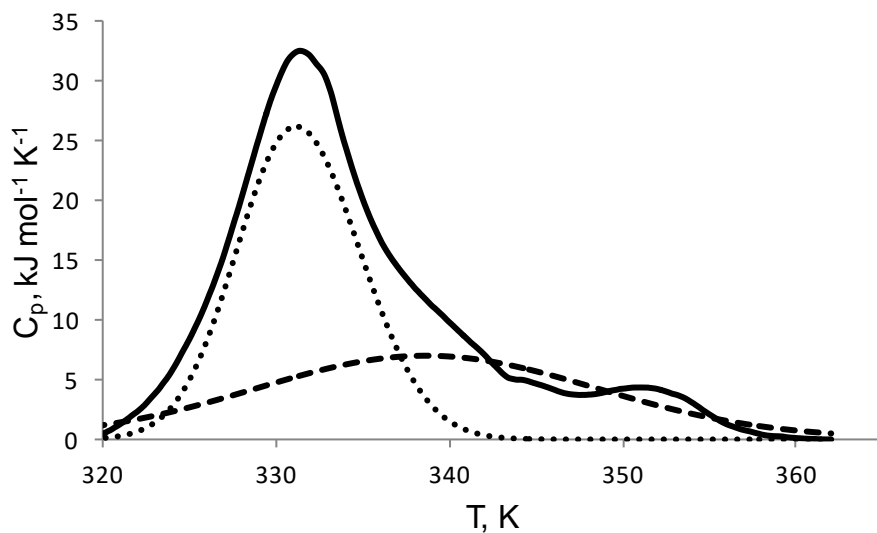

**Fig. S5.** PeakFit decomposition of DSC thermogram for BSA thermal denaturation. Albumin concentration is  $1.05 \times 10^{-4}$  M, scan rate of 1 K/min. The raw data is represented by solid line, PeakFit component 1 by dotted line and PeakFit component 2 by dashed line.

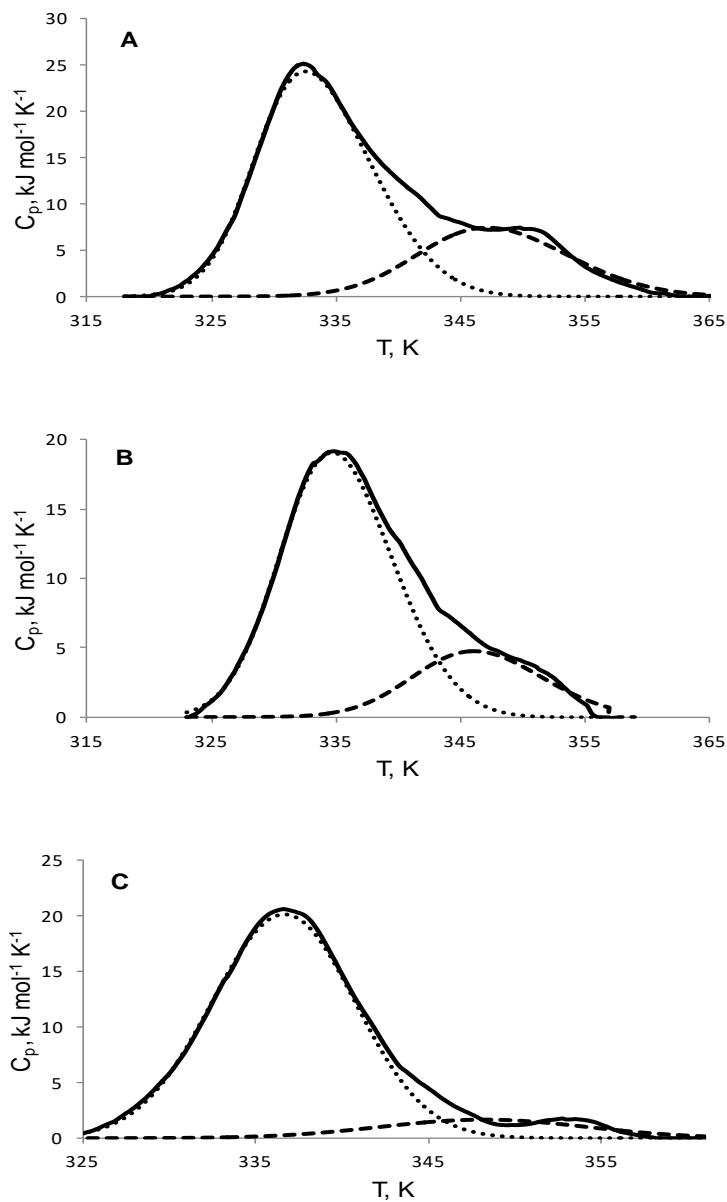

**Fig. S6** PeakFit decomposition of DSC thermogram of CA: BSA thermal denaturation at different molar ratio (A) 1:1, (B) 3.5:1, (C) 20:1. Albumin concentration is  $1.05 \times 10^{-4}$  M, scan rate of 1 K/min. The raw data is represented by solid line, PeakFit component 1 by dotted line and PeakFit component 2 by dashed line.

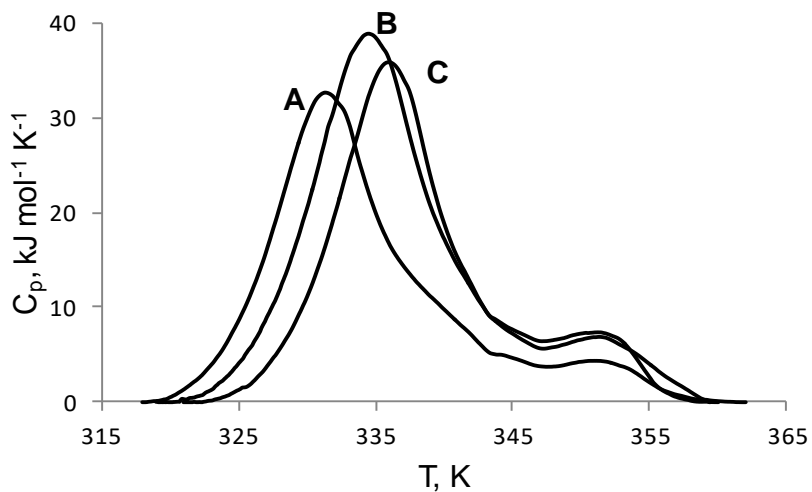

**Fig. S7** Influence of different concentrations of WAR on BSA thermal denaturation: (A) WAR: BSA 0, (B) WAR: BSA 1:1, (C) WAR: BSA 3:1 molar ratios.

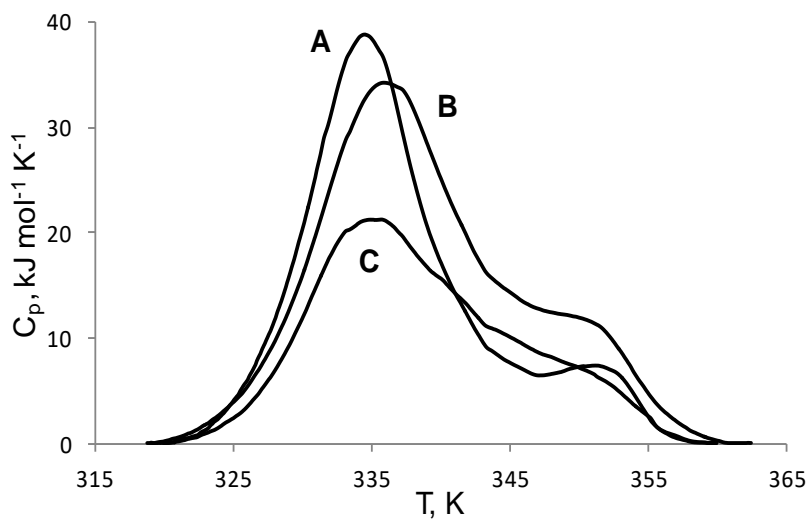

**Fig. S8** Influence of competitive binding of WAR and CA on BSA thermal denaturation: (A) WAR: BSA 1:1, (B) WAR: BSA 1:1 and CA  $3.70 \times 10^{-4}$  M, (C) BSA and CA  $3.70 \times 10^{-4}$  M.

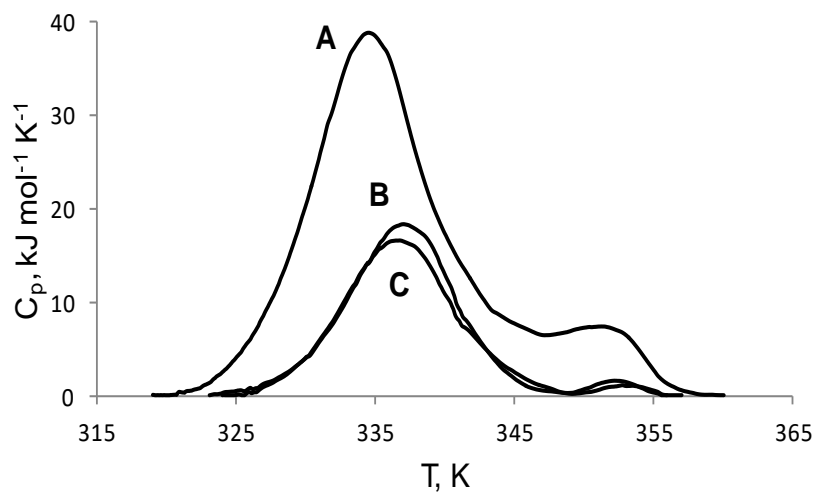

**Fig. S9** Influence of competitive binding of WAR and CA on BSA thermal denaturation: (A) WAR: BSA 1:1, (B) WAR: BSA 1:1 and CA  $2.10 \times 10^{-3}$  M, (C) BSA and CA  $2.10 \times 10^{-3}$  M.

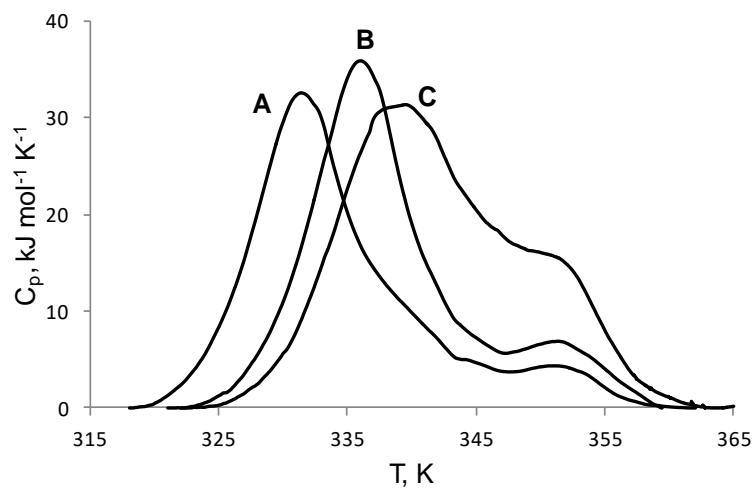

**Fig. S10** Influence of competitive binding of WAR and CA on BSA thermal denaturation: (A) BSA, (B) WAR: BSA 3:1, (C) WAR: BSA 3:1 and CA  $3.70 \times 10^{-4}$  M.



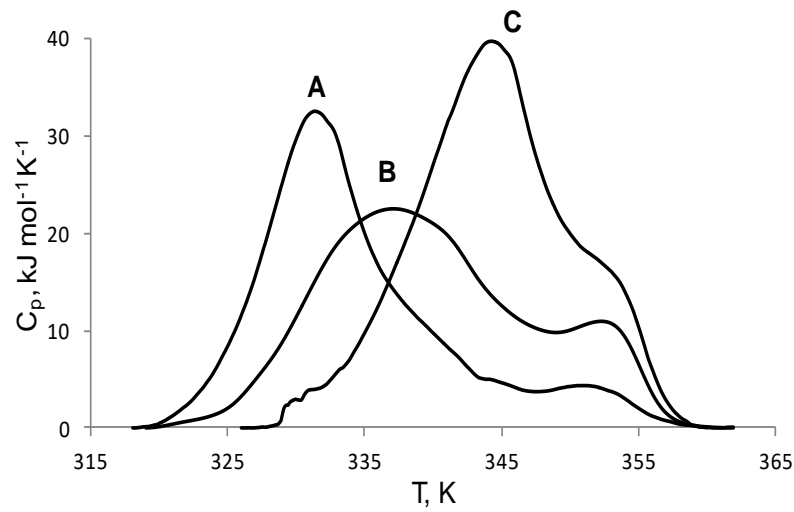

**Fig. S11** Influence of different concentrations of IBP on BSA thermal denaturation: (A) IBP: BSA 0, (B) IBP: BSA 1:1, (C) IBP: BSA 3:1 molar ratio.

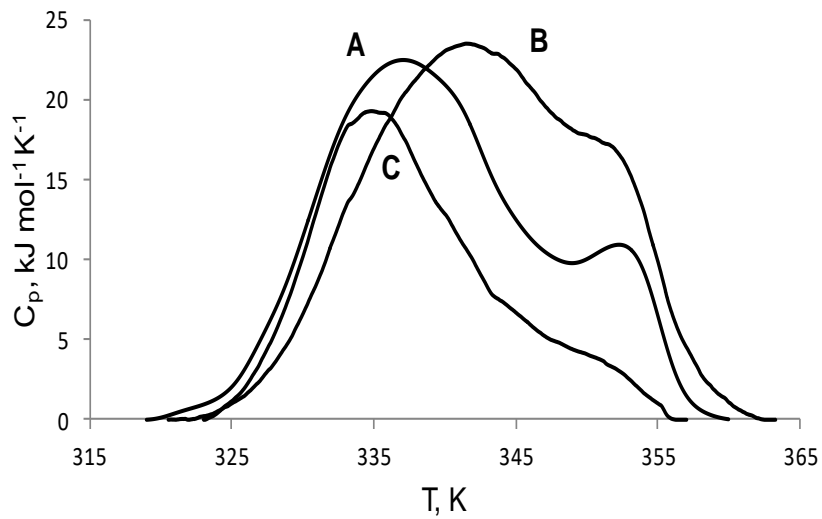

**Fig. S12** Influence of competitive binding of IBP and CA on BSA thermal denaturation: (A) IBP: BSA 1:1, (B) IBP: BSA 1:1 and CA  $3.70 \times 10^{-4}$  M, (C) BSA and CA  $3.70 \times 10^{-4}$  M.

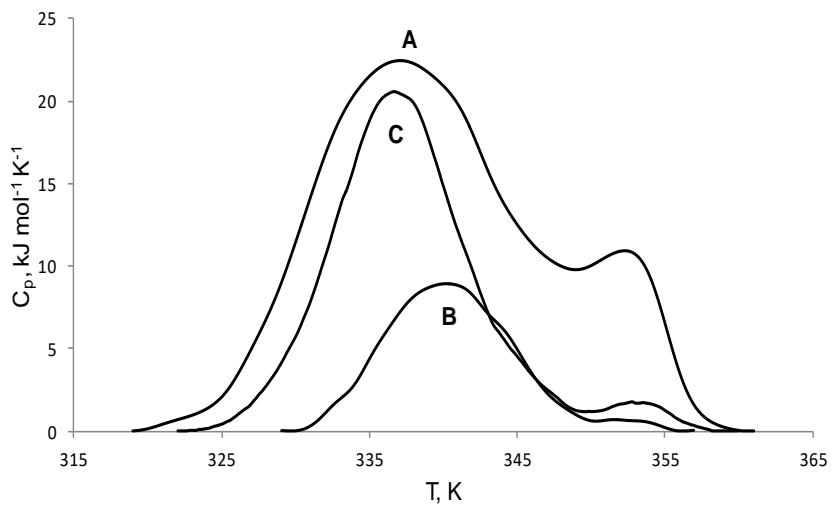

**Fig. S13** Influence of competitive binding of IBP and CA on BSA thermal denaturation: (A) IBP: BSA 1:1, (B) IBP: BSA 1:1 and CA  $2.10 \times 10^{-3}$  M, (C) BSA and CA  $2.10 \times 10^{-3}$  M.

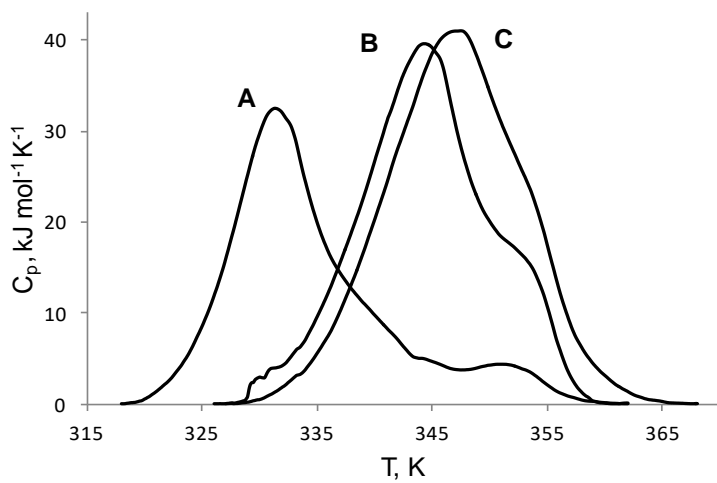

**Fig. S14** Influence of competitive binding of IBP and CA on BSA thermal denaturation: (A) IBP: BSA 0, (B) IBP: BSA 3:1, (C) IBP: BSA 3:1 and CA  $3.70 \times 10^{-4}$  M.

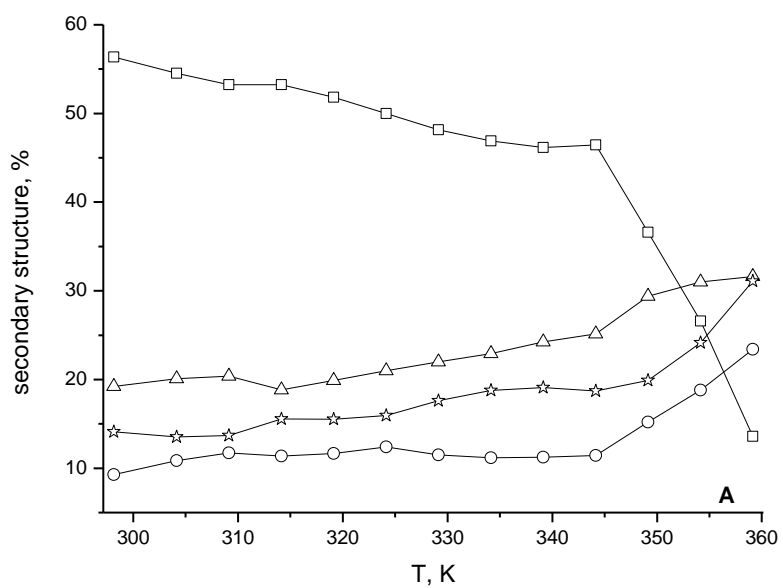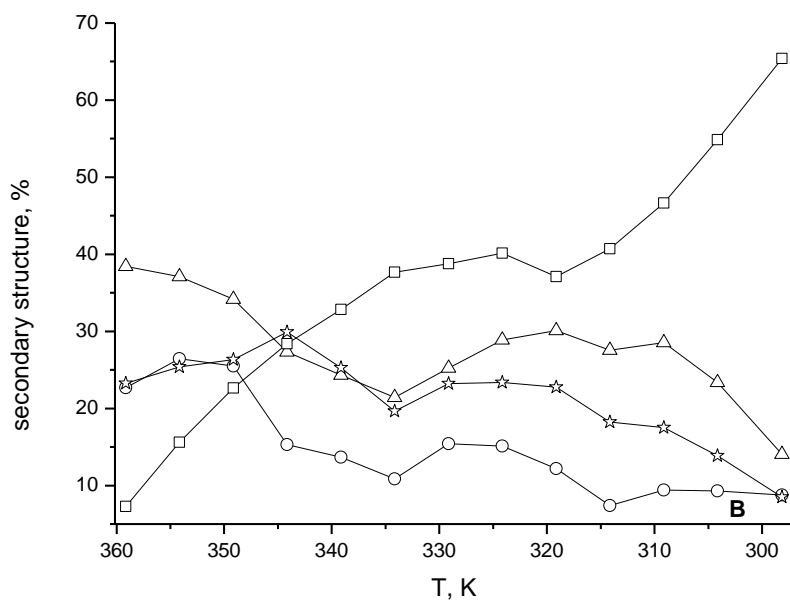

**Fig. S15** Temperature variation of the secondary structure content (determined on Dichroweb) for BSA (squares-  $\alpha$ -helix, triangles- $\beta$ -sheets, circles- turns, star-unordered, A-unfolding, B-refolding).

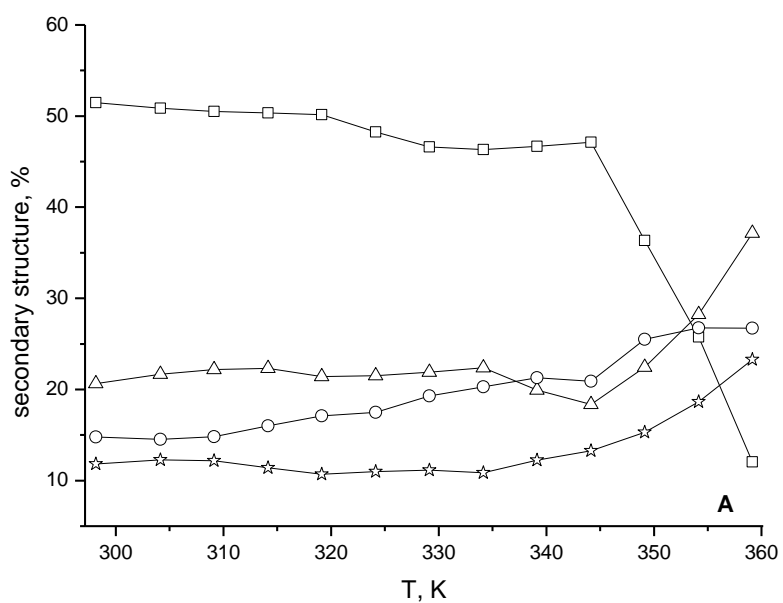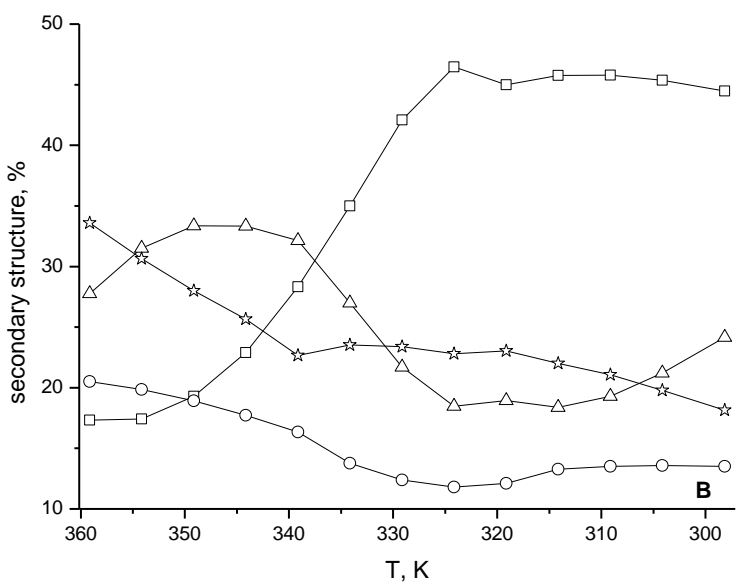

**Fig. S16** Temperature variation of the secondary structure content (determined on Dichroweb) for CA: BSA = 1:1 molar ratio (squares-  $\alpha$ -helix, triangles- $\beta$ -sheets, circles- turns, star- unordered, A-unfolding, B-refolding).

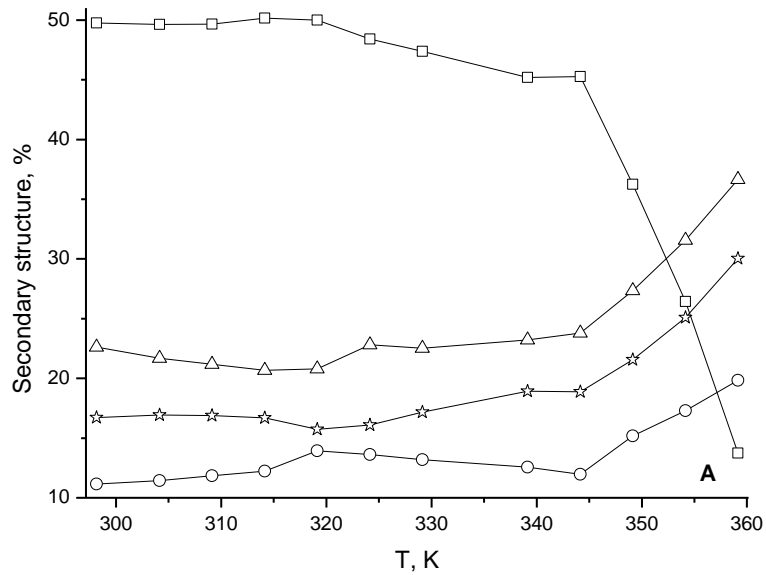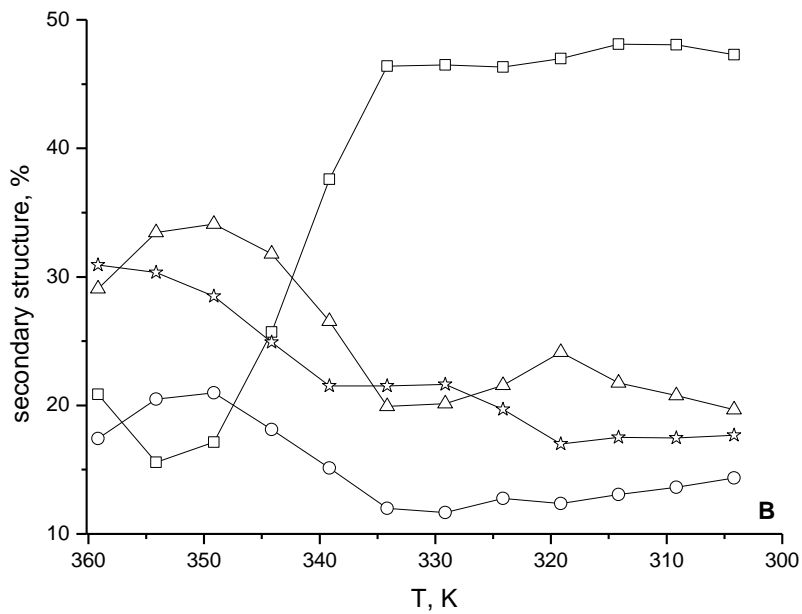

**Fig. S17** Temperature variation of the secondary structure content (determined on Dichroweb) for CA: BSA = 20:1 molar ratio (squares-  $\alpha$ -helix, triangles- $\beta$ -sheets, circles- turns, star-unordered, A-unfolding, B-refolding).
